# Supplementary material
Source: PubMed Central journal article supplement (PMC1599932)

A

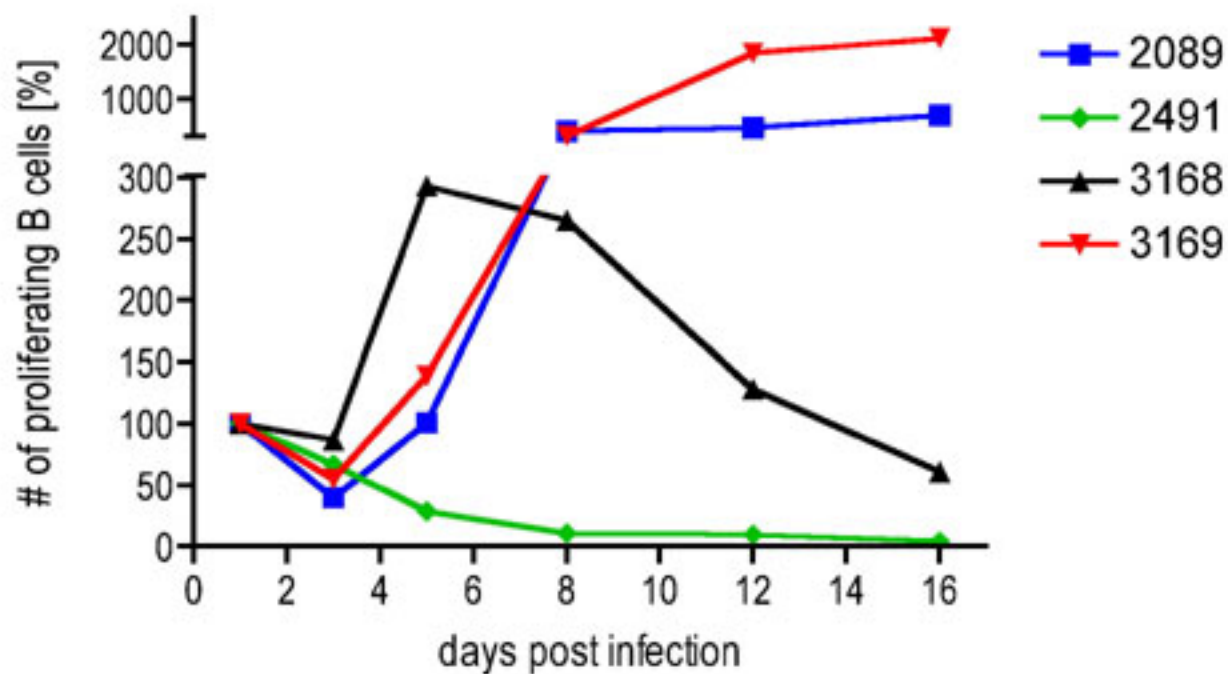

B

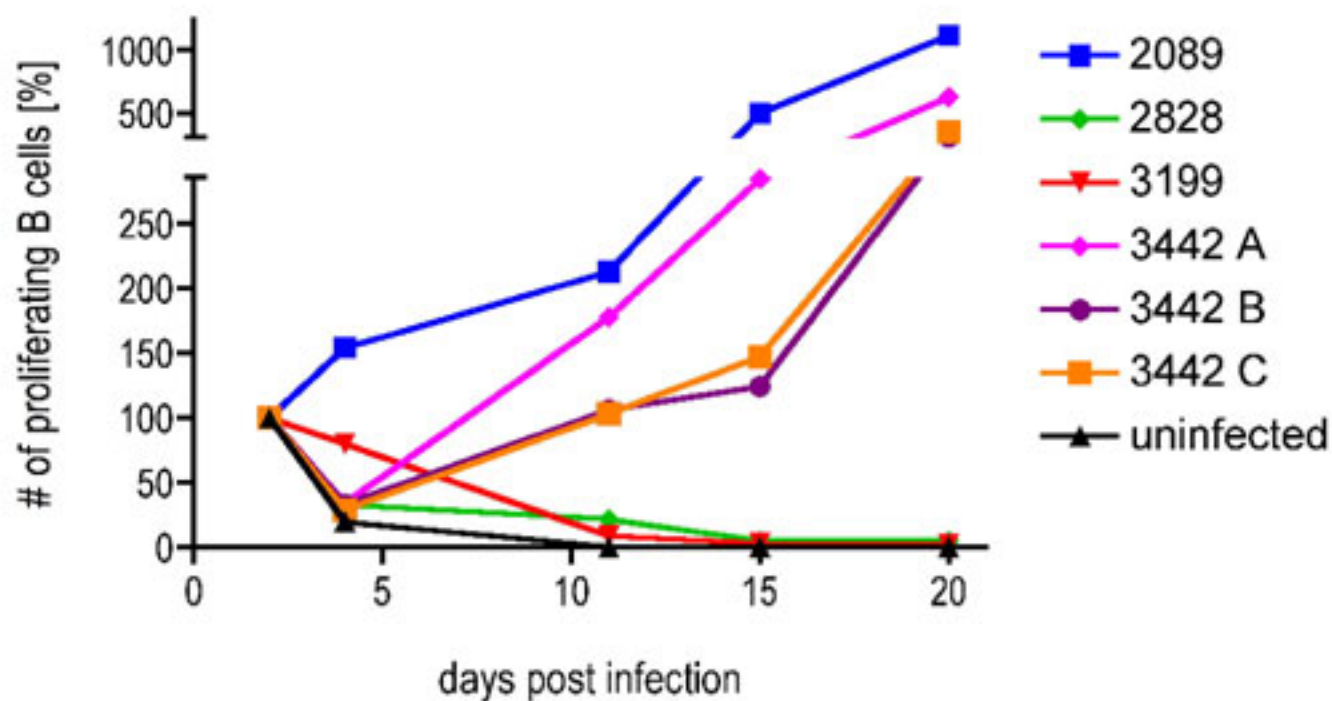

Supplement: pnas_0605985103_1.pdf [file pnas_0605985103_1.pdf]
